# Supplementary material for: Progress in Nonalcoholic Fatty Liver Disease: SIRT Family Regulates Mitochondrial Biogenesis
Source: MDPI journal article supplement (doi:10.3390/biom12081079), 2022-08-05
Supplement: s1 [file s1]

## Supplementary Material

**Table S1.** The function and mechanism of SIRT in regulation of mitochondrial biogenesis with NAFLD.

| Reference            | Country | Publication Year | Stimulation               | Active State of SIRT                           | Molecules Involved                                      | Effects                                                                                                                                                                                                             |
|----------------------|---------|------------------|---------------------------|------------------------------------------------|---------------------------------------------------------|---------------------------------------------------------------------------------------------------------------------------------------------------------------------------------------------------------------------|
| Yang M [110]         | China   | 2021             | conditioned medium        | upregulated protein levels of SIRT1            | PGC-1 $\alpha$                                          | Improved insulin resistance in diabetic mice, amended the pathological structure of the liver, enhanced the liver's total antioxidant capacity and mitochondrial function, reduced inflammation and cell apoptosis. |
| Jiang Y [114]        | China   | 2021             | HFD                       | decreased the mRNA and protein levels of SIRT1 | PGC-1 $\alpha$ , Beclin-1, p62/SQSTM1                   | Caused viability reduction, apoptosis, lipid accumulation, and reactive oxygen species production.                                                                                                                  |
| Yang H [111]         | China   | 2021             | SIRT1-knockdown db/m mice | decreased the mRNA and protein levels of SIRT1 | PGC-1 $\alpha$                                          | Increased oxidative stress and mitochondrial dysfunction.                                                                                                                                                           |
| Yang YL [115]        | China   | 2020             | MicroRNA-29a, MCD diet    | decreased the mRNA and protein levels of SIRT1 | GSK3 $\beta$ , PGC-1 $\alpha$ , TFAM, CHOP, LONP1, CD36 | Reversed the aberrant SIRT1-mediated mitochondrial biogenesis and mitochondrial proteostatic stress, ultimately mitigating the pathological progression.                                                            |
| Ren T [122]          | China   | 2019             | blueberry juice           | upregulated protein levels of SIRT1            | PGC-1 $\alpha$ , GSH, SOD2                              | Reduced mitochondrial oxidative stress, decreasing the MDA level, elevated the GSH and SOD levels, and suppressed the ROS activity.                                                                                 |
| da Silva Lima N [21] | Spain.  | 2022             | knockdown of ATG3         | upregulated protein levels of SIRT1            | JNK1, CPT1a                                             | Ameliorated p63- and diet-induced steatosis, improved fatty acid metabolism and stimulated mitochondrial function.                                                                                                  |
| He X [117]           | China   | 2019             | Cadmium                   | suppressed SIRT1 signaling pathway             | PPAR $\alpha$ , CPT1a, VLCAD, MCAD                      | Inhibited the mitochondrial fatty acid oxidation.                                                                                                                                                                   |

|                      |          |      |                                     |                                                  |                                     |                                                                                                                                                                                          |
|----------------------|----------|------|-------------------------------------|--------------------------------------------------|-------------------------------------|------------------------------------------------------------------------------------------------------------------------------------------------------------------------------------------|
| Guo L [45]           | China    | 2019 | high-fat/high-sucrose diet-fed mice | decreased the mRNA and protein levels of SIRT2   | ACLY                                | Overexpressing SIRT2 in AML12 cells inhibited lipid accumulation, which was reversed by overexpressing the ACLY-3KQ variant rather than by overexpressing WT ACLY.                       |
| Du S [140]           | China    | 2022 | curcumin                            | upregulated the mRNA and protein levels of SIRT3 | SOD2                                | Decreased the levels of cellular lipids and mitochondrial reactive oxygen species, and increased the mitochondrial DNA copy number and superoxide dismutase activity in fatty L02 cells. |
| Zhang X [146]        | China    | 2021 | Major royal jelly proteins          | upregulated the mRNA and protein levels of SIRT3 | AMPK, SOD2, COX IV                  | Reduced lipid droplet content, triglyceride, ALT, and AST, and restored mitochondrial membrane potential.                                                                                |
| Zeng X [145]         | China    | 2019 | dihydromyricetin                    | upregulated the mRNA and protein levels of SIRT3 | AMPK, PGC-1 $\alpha$ , ERR $\alpha$ | Ameliorated mitochondrial dysfunction and oxidative stress.                                                                                                                              |
| Cheng Y [150]        | China    | 2016 | microRNA-421                        | decreased the mRNA and protein levels of SIRT3   | FOXO3, MnSOD, CAT                   | Modulated the oxidant stress and lipid metabolism, and reduced cellular oxidative damage.                                                                                                |
| Teodoro JS [151]     | Portugal | 2013 | Berberine                           | Increased mitochondrial SIRT3 activity           | COX, SDH                            | Increased mitochondrial SIRT3 activity, normalized mitochondrial function, and prevented a state of energetic deficit.                                                                   |
| He J [141]           | USA      | 2013 | Activation of AhR, MCD diet         | deactivated the mitochondrial SIRT3              | SOD2, TiPARP                        | Increased hepatic steatosis, production of ROS, and lipid peroxidation.                                                                                                                  |
| Valdecantos MP [152] | Spain    | 2012 | Lipoic acid                         | Increased mitochondrial SIRT3 activity           | Foxo3a, PGC-1 $\beta$               | Prevented hepatic triglyceride accumulation and liver oxidative damage and stimulation of mitochondrial antioxidant defenses.                                                            |

|                   |                |      |                                                          |                                                                                                                                                     |                                                      |                                                                                                                                                                                         |
|-------------------|----------------|------|----------------------------------------------------------|-----------------------------------------------------------------------------------------------------------------------------------------------------|------------------------------------------------------|-----------------------------------------------------------------------------------------------------------------------------------------------------------------------------------------|
| Sun M [147]       | USA            | 2021 | cocoa or cocoa polyphenols                               | upregulated the protein levels of SIRT3                                                                                                             | PGC1a, NRF1, Foxo3a                                  | Prevented body weight gain, hepatic triacylglycerols, lipid peroxides, and mitochondrial DNA damage.                                                                                    |
| Staňková P [154]  | Czech Republic | 2021 | Western-style diet                                       | decreased the mRNA and protein levels of SIRT3                                                                                                      | SDH, SUCNR1                                          | Did not observe signs of oxidative damage compared to the control group and may be adaptive to prevent mitochondrial respiratory chain overload and massive ROS production.             |
| Nassir F [153]    | USA            | 2018 | Overexpression of SIRT3 in MTP+/- mice, HFD diet         | upregulated the mRNA and protein levels of SIRT3                                                                                                    | MTP, FAO, CD38                                       | Reduced the acetylation of MTP compared with $\beta$ -galactosidase controls, increased mitochondrial FAO, and reduced hepatic steatosis, CD68, and serum ALT levels.                   |
| Liu Y [155]       | China          | 2016 | RBP4-Tg mice                                             | decreased activity of SIRT3                                                                                                                         | long-chain acyl-coenzyme A dehydrogenase             | Induced mitochondrial dysfunction and the deterioration of lipid metabolism.                                                                                                            |
| Guo L [158]       | China          | 2016 | knockdown of SIRT4 in the livers of HF/HS diet-fed mice  | decreased the mRNA and protein levels of SIRT4                                                                                                      | MTP $\alpha$ ,                                       | Promoted hepatic fatty acid oxidation, as indicated by elevated plasma $\beta$ -hydroxybutyrate and inhibited hepatic steatosis and its accompanying pathology and metabolic disorders. |
| Zhang S [168]     | China          | 2022 | 2,3,5,4'-tetrahydroxy-stilbene-2-O- $\beta$ -d-glucoside | increased SIRT5 expression by regulating its mRNA stability through enhancing the binding of SIRT5 mRNA with serine/arginine-rich splicing factor 2 | CPT1A, SRSF2                                         | Reduced ROS formation and attenuated mitochondrial dysfunction both in vivo and in vitro.                                                                                               |
| Goetzman ES [167] | USA            | 2020 | Sirt5 knockout mice, Medium-chain triglycerides          | decreased the mRNA and protein levels of SIRT5                                                                                                      | mitochondrial acyl-CoA synthetase, mitochondrial C12 | Induced the steatosis phenotype.                                                                                                                                                        |

Abbreviations: PGC-1 $\alpha$ , peroxisome proliferator-activated receptor gamma coactivator-1 $\alpha$ ; p62: p62/SQSTM1, sequestosome 1; GSK3 $\beta$ , glycogen synthase kinase 3 beta; TFAM, mitochondrial transcription factor A; CHOP, C/EBP homologous protein; LONP1, lon peptidase 1; JNK1, Jun N-terminal protein kinase 1; CPT1a, carnitine palmitoyltransferase 1A; PPAR $\alpha$ , peroxisome proliferator-activated receptor  $\alpha$ ; ACLY, adenosine triphosphate-citrate lyase; AMPK, adenosine 5-monophosphate (AMP)-activated protein kinase; COX IV, cytochrome c oxidase IV; ERR $\alpha$ , FOXO3, Forkhead Box O3; CAT, catalase; SOD, superoxide dismutase; TiPARP, tetrachlorodibenzo-p-dioxin (TCDD)-inducible poly(ADP-ribose) polymerase; NRF1, nuclear respiratory factor 1; SDH, succinate dehydrogenase; SUCNR1, Succinate receptor 1; MTP, mitochondrial trifunctional protein; FAO, fatty acid oxidation; SRSF2, serine/arginine-rich splicing factor 2.
